# Supplementary material for: Controlled synthesis of pyrochlore Pr2Sn2O7 nanospheres with enhanced gas sensing performance
Source: Royal Society of Chemistry journal article supplement (doi:10.1039/c5ra26028k), 2016-01-01
Supplement: c5ra26028k1.pdf [file c5ra26028k1.pdf]

## Supporting Information

### **Controlled Synthesis of Pyrochlore Pr<sub>2</sub>Sn<sub>2</sub>O<sub>7</sub> Nanospheres with Enhanced Gas Sensing Performance†**

**Qi Liu,<sup>\*a</sup> Miao Xu,<sup>a</sup> Ze-Xian Low,<sup>c</sup> Wen Zhang,<sup>a</sup> Feng Tao,<sup>a</sup> Feng Liu,<sup>b</sup> Ning Liu<sup>a</sup>**

<sup>a</sup> *Department of materials science and Engineering, Anhui Polytechnic University, Wuhu, Anhui 241000, P. R. China.*

*Fax: +86 553 2871 252 ; Tel: +86 553 2871 252*

*E-mail: modieer\_67@ahpu.edu.cn*

<sup>b</sup> *College of Mathematics and Physics, Anhui Polytechnic University, Wuhu 241000, P. R. China.*

<sup>c</sup> *Department of Chemical Engineering, University of Bath, Claverton Down, Bath BA2 7AY, United Kingdom*

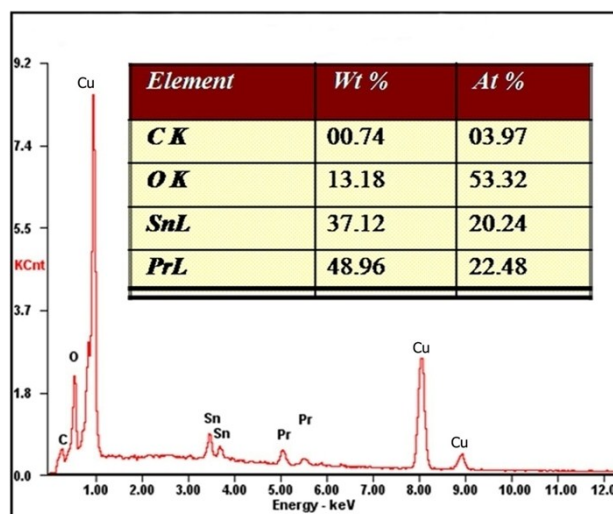

**Fig.S1** EDS spectra of the synthesized  $\text{Pr}_2\text{Sn}_2\text{O}_7$  nanospheres.

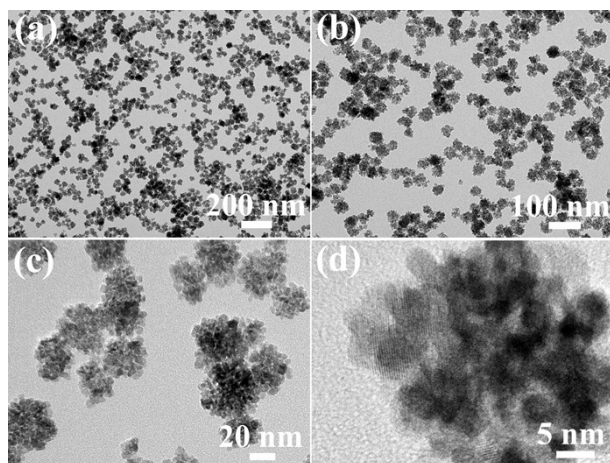

**Fig. S2** TEM images of the Pr<sub>2</sub>Sn<sub>2</sub>O<sub>7</sub> nanospheres at different magnifications.

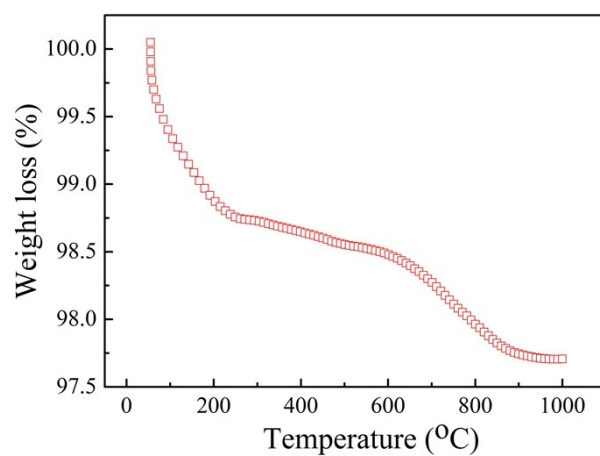

**Fig.S3** TG curve of Pr<sub>2</sub>Sn<sub>2</sub>O<sub>7</sub> nanospheres obtained in nitrogen atmosphere, with heating rate 10 °C min<sup>-1</sup>.

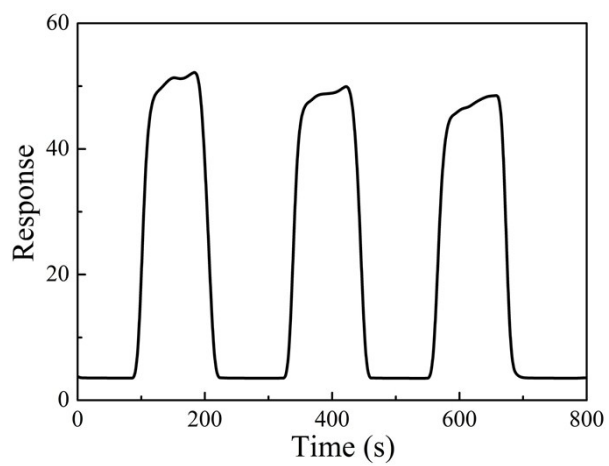

**Fig.S4** The repeatability of  $\text{Pr}_2\text{Sn}_2\text{O}_7$  nanospheres sensor for ethanol gas of 100 ppm at 300 °C.

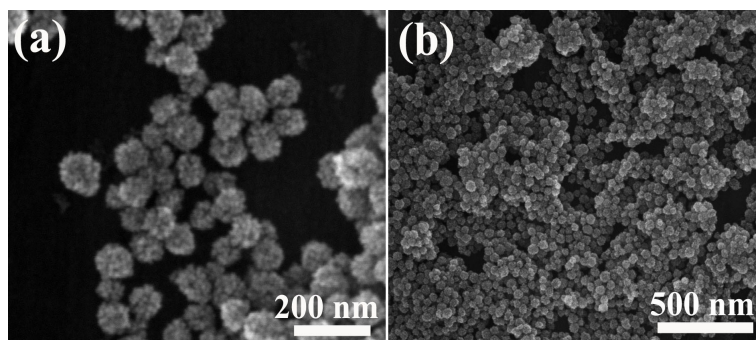

**Fig. S5** SEM images of the Pr<sub>2</sub>Sn<sub>2</sub>O<sub>7</sub> nanospheres after 300 °C heat treatment for 2 h at different magnifications.

**Table S1** Nitrogen adsorption–desorption isotherm liner plot of Pr<sub>2</sub>Sn<sub>2</sub>O<sub>7</sub> nanospheres

| Adsorption               |                                            | Desorption               |                                            |
|--------------------------|--------------------------------------------|--------------------------|--------------------------------------------|
| Relative Pressure (P/Po) | Quantity Adsorbed (cm <sup>2</sup> /g STP) | Relative Pressure (P/Po) | Quantity Adsorbed (cm <sup>2</sup> /g STP) |
| 0.00996059               | 12.7911                                    | 0.991791                 | 166.68                                     |
| 0.0329375                | 15.7007                                    | 0.988504                 | 160.086                                    |
| 0.0628705                | 17.8313                                    | 0.974671                 | 156.022                                    |
| 0.0782717                | 18.7058                                    | 0.956294                 | 148.791                                    |
| 0.0992556                | 19.7835                                    | 0.928524                 | 118.277                                    |
| 0.119252                 | 20.723                                     | 0.89873                  | 85.777                                     |
| 0.13916                  | 21.6062                                    | 0.878171                 | 72.6089                                    |
| 0.159122                 | 22.4577                                    | 0.846042                 | 62.8238                                    |
| 0.179041                 | 23.2804                                    | 0.821543                 | 58.4465                                    |
| 0.199059                 | 24.0921                                    | 0.805963                 | 56.2807                                    |
| 0.24652                  | 25.9856                                    | 0.700898                 | 47.2434                                    |
| 0.298269                 | 28.0511                                    | 0.642888                 | 43.9743                                    |
| 0.348695                 | 30.1133                                    | 0.605208                 | 42.1102                                    |
| 0.397459                 | 32.1659                                    | 0.55307                  | 39.6915                                    |
| 0.447101                 | 34.3406                                    | 0.502581                 | 37.407                                     |
| 0.496811                 | 36.6158                                    | 0.452875                 | 34.9803                                    |
| 0.546681                 | 38.9702                                    | 0.403387                 | 32.0377                                    |
| 0.596154                 | 41.432                                     | 0.352854                 | 29.7895                                    |
| 0.646147                 | 44.006                                     | 0.302909                 | 27.7249                                    |
| 0.695462                 | 46.7513                                    | 0.252213                 | 25.6861                                    |
| 0.74479                  | 49.9184                                    | 0.202268                 | 23.6883                                    |
| 0.793441                 | 53.9207                                    | 0.142342                 | 21.2114                                    |
| 0.81697                  | 56.4031                                    |                          |                                            |
| 0.845043                 | 60.1689                                    |                          |                                            |
| 0.869163                 | 64.5912                                    |                          |                                            |
| 0.898856                 | 73.1194                                    |                          |                                            |
| 0.923428                 | 86.449                                     |                          |                                            |
| 0.945452                 | 110.381                                    |                          |                                            |
| 0.969142                 | 146.266                                    |                          |                                            |
| 0.990087                 | 158.461                                    |                          |                                            |
| 0.991791                 | 166.68                                     |                          |                                            |

**Table S2** Nitrogen adsorption–desorption isotherm liner plot of SSR-Pr<sub>2</sub>Sn<sub>2</sub>O<sub>7</sub> sample

| Adsorption               |                                            | Desorption               |                                            |
|--------------------------|--------------------------------------------|--------------------------|--------------------------------------------|
| Relative Pressure (P/Po) | Quantity Adsorbed (cm <sup>2</sup> /g STP) | Relative Pressure (P/Po) | Quantity Adsorbed (cm <sup>2</sup> /g STP) |
| 0.0112434                | 1.28187                                    | 0.993651                 | 31.4288                                    |
| 0.033653                 | 1.54066                                    | 0.988011                 | 26.2709                                    |
| 0.0682425                | 1.7447                                     | 0.981452                 | 21.7267                                    |
| 0.079866                 | 1.80536                                    | 0.973477                 | 17.8612                                    |
| 0.0998794                | 1.89402                                    | 0.952512                 | 12.9558                                    |
| 0.119843                 | 1.98048                                    | 0.920027                 | 9.9453                                     |
| 0.13978                  | 2.06676                                    | 0.888043                 | 8.43478                                    |
| 0.15976                  | 2.14873                                    | 0.860058                 | 7.56115                                    |
| 0.179735                 | 2.23171                                    | 0.833853                 | 6.92251                                    |
| 0.199705                 | 2.3056                                     | 0.825893                 | 6.75062                                    |
| 0.249146                 | 2.47897                                    | 0.801252                 | 6.3005                                     |
| 0.299315                 | 2.64625                                    | 0.705869                 | 5.14557                                    |
| 0.348939                 | 2.82375                                    | 0.653153                 | 4.70474                                    |
| 0.398937                 | 2.99699                                    | 0.60214                  | 4.33907                                    |
| 0.44866                  | 3.17911                                    | 0.551567                 | 4.03148                                    |
| 0.498576                 | 3.36862                                    | 0.501546                 | 3.74757                                    |
| 0.548415                 | 3.56794                                    | 0.453248                 | 2.97691                                    |
| 0.598209                 | 3.80032                                    | 0.382634                 | 2.69093                                    |
| 0.648114                 | 4.07313                                    | 0.331686                 | 2.50949                                    |
| 0.697942                 | 4.39281                                    | 0.281549                 | 2.33126                                    |
| 0.747616                 | 4.8071                                     | 0.231395                 | 2.15699                                    |
| 0.797345                 | 5.36824                                    | 0.181274                 | 1.97985                                    |
| 0.819078                 | 5.65939                                    | 0.121385                 | 1.76124                                    |
| 0.847989                 | 6.17784                                    |                          |                                            |
| 0.873188                 | 6.78626                                    |                          |                                            |
| 0.89805                  | 7.57056                                    |                          |                                            |
| 0.922208                 | 8.69741                                    |                          |                                            |
| 0.946145                 | 10.4758                                    |                          |                                            |
| 0.973538                 | 15.4263                                    |                          |                                            |
| 0.980134                 | 18.1496                                    |                          |                                            |
| 0.987436                 | 24.0444                                    |                          |                                            |
| 0.993651                 | 31.4288                                    |                          |                                            |



**Table S3** Nitrogen adsorption–desorption isotherm liner plot of Pr<sub>2</sub>Sn<sub>2</sub>O<sub>7</sub> nanospheres after 300 °C heat treatment for 2 h

| Adsorption                  |                                               | Desorption                  |                                               |
|-----------------------------|-----------------------------------------------|-----------------------------|-----------------------------------------------|
| Relative Pressure<br>(P/Po) | Quantity Adsorbed<br>(cm <sup>3</sup> /g STP) | Relative Pressure<br>(P/Po) | Quantity Adsorbed<br>(cm <sup>3</sup> /g STP) |
| 0.0101086                   | 11.3203                                       | 0.992679                    | 59.4996                                       |
| 0.033317                    | 13.6929                                       | 0.986456                    | 54.6629                                       |
| 0.0637108                   | 15.3816                                       | 0.976136                    | 50.9549                                       |
| 0.0786203                   | 16.0428                                       | 0.965225                    | 48.701                                        |
| 0.0994729                   | 16.8516                                       | 0.954512                    | 47.2392                                       |
| 0.119523                    | 17.5527                                       | 0.930613                    | 44.8768                                       |
| 0.13947                     | 18.1958                                       | 0.903429                    | 42.9051                                       |
| 0.159555                    | 18.8007                                       | 0.878313                    | 41.3353                                       |
| 0.179625                    | 19.3633                                       | 0.852411                    | 39.8731                                       |
| 0.199743                    | 19.902                                        | 0.827153                    | 38.5272                                       |
| 0.247902                    | 21.0808                                       | 0.801779                    | 37.2826                                       |
| 0.300297                    | 22.2249                                       | 0.70037                     | 33.151                                        |
| 0.348595                    | 23.1957                                       | 0.653764                    | 31.5572                                       |
| 0.39853                     | 24.1398                                       | 0.602851                    | 30.0003                                       |
| 0.448288                    | 25.0788                                       | 0.552323                    | 28.5886                                       |
| 0.498171                    | 26.0602                                       | 0.501849                    | 27.3272                                       |
| 0.547872                    | 27.1457                                       | 0.453736                    | 25.7546                                       |
| 0.597698                    | 28.3884                                       | 0.402333                    | 24.1001                                       |
| 0.647473                    | 29.8104                                       | 0.351871                    | 23.0267                                       |
| 0.697122                    | 31.4451                                       | 0.302333                    | 22.0401                                       |
| 0.746695                    | 33.3545                                       | 0.251447                    | 20.9478                                       |
| 0.796358                    | 35.582                                        | 0.201425                    | 19.7443                                       |
| 0.818787                    | 36.7091                                       | 0.141425                    | 18.0851                                       |
| 0.847816                    | 38.274                                        |                             |                                               |
| 0.872678                    | 39.7941                                       |                             |                                               |
| 0.897886                    | 41.4552                                       |                             |                                               |
| 0.922189                    | 43.3181                                       |                             |                                               |
| 0.946806                    | 45.6084                                       |                             |                                               |
| 0.970044                    | 48.7928                                       |                             |                                               |
| 0.978714                    | 50.7409                                       |                             |                                               |
| 0.987424                    | 54.2726                                       |                             |                                               |
| 0.992679                    | 59.4996                                       |                             |                                               |
